# Supplementary material for: Procyanidin B2 mitigates behavioral impairment and protects myelin integrity in cuprizone-induced schizophrenia in mice
Source: Royal Society of Chemistry journal article supplement (doi:10.1039/c8ra03854f), 2018-01-01
Supplement: c8ra03854f1.pdf [file c8ra03854f1.pdf]

## 1 Open-field test

### 1-1 Central dwell time

| Number | CON | CPZ | 20 mg/kg PB | 100 mg/kg PB |
|--------|-----|-----|-------------|--------------|
| 1      | 25  | 13  | 9           | 16           |
| 2      | 18  | 10  | 11          | 23           |
| 3      | 16  | 8   | 7           | 21           |
| 4      | 25  | 7   | 7           | 12           |
| 5      | 13  | 5   | 14          | 13           |
| 6      | 18  | 12  | 5           | 15           |
| 7      | 26  | 13  | 9           | 17           |
| 8      | 23  | 12  | 10          | 16           |

### 1-2 Peripheral locomotion time

| Number | CON | CPZ | 20 mg/kg PB | 100 mg/kg PB |
|--------|-----|-----|-------------|--------------|
| 1      | 275 | 287 | 271         | 274          |
| 2      | 282 | 290 | 279         | 287          |
| 3      | 274 | 292 | 293         | 279          |
| 4      | 275 | 283 | 293         | 298          |
| 5      | 287 | 285 | 296         | 287          |
| 6      | 292 | 288 | 295         | 285          |
| 7      | 274 | 297 | 281         | 293          |
| 8      | 277 | 288 | 270         | 284          |

### 1-3 Percent of central crossing

| Number | CON   | CPZ   | 20 mg/kg PB | 100 mg/kg PB |
|--------|-------|-------|-------------|--------------|
| 1      | 19.64 | 12.64 | 6.67        | 16.15        |
| 2      | 22.74 | 10.64 | 10.24       | 20.08        |
| 3      | 25.74 | 10.59 | 12.32       | 18.24        |
| 4      | 13.40 | 10.92 | 4.71        | 13.11        |
| 5      | 15.73 | 12.00 | 13.56       | 11.21        |
| 6      | 18.62 | 7.69  | 11.11       | 17.31        |
| 7      | 23.33 | 2.25  | 14.81       | 17.62        |
| 8      | 19.40 | 12.99 | 12.90       | 16.24        |

## 2 Rpta-rod test

### 2-1 Locomotion time /s

| Number | CON | CPZ | 20 mg/kg PB | 100 mg/kg PB |
|--------|-----|-----|-------------|--------------|
| 1      | 130 | 48  | 111         | 160          |
| 2      | 111 | 36  | 93          | 170          |
| 3      | 120 | 69  | 94          | 136          |

|   |     |    |     |     |
|---|-----|----|-----|-----|
| 4 | 114 | 60 | 115 | 113 |
| 5 | 160 | 91 | 101 | 110 |
| 6 | 95  | 86 | 100 | 114 |
| 7 | 128 | 50 | 98  | 139 |
| 8 | 128 | 58 | 131 | 137 |

### 2-2 Number of falls in 5 minutes

| Number | CON | CPZ | 20 mg/kg PB | 100 mg/kg PB |
|--------|-----|-----|-------------|--------------|
| 1      | 1   | 9   | 8           | 3            |
| 2      | 5   | 12  | 3           | 6            |
| 3      | 2   | 7   | 4           | 8            |
| 4      | 3   | 8   | 7           | 5            |
| 5      | 5   | 11  | 7           | 3            |
| 6      | 6   | 13  | 10          | 6            |
| 7      | 4   | 8   | 5           | 4            |
| 8      | 2   | 5   | 8           | 3            |

## 3 Morris water maze

### 3-1 Escape latencies during 4 days of training

#### DAY 1

| Number | CON   | CPZ   | 20 mg/kg PB | 100 mg/kg PB |
|--------|-------|-------|-------------|--------------|
| 1      | 58.02 | 58.01 | 52.52       | 56.59        |
| 2      | 56.56 | 56.56 | 53.66       | 48.06        |
| 3      | 52.20 | 52.20 | 56.61       | 53.20        |
| 4      | 51.19 | 51.19 | 55.59       | 49.45        |
| 5      | 51.60 | 51.59 | 56.91       | 45.28        |
| 6      | 52.58 | 56.17 | 38.37       | 51.33        |
| 7      | 54.15 | 52.58 | 58.64       | 49.77        |
| 8      | 51.69 | 52.20 | 45.80       | 42.94        |

#### DAY 2

| Number | CON   | CPZ   | 20 mg/kg PB | 100 mg/kg PB |
|--------|-------|-------|-------------|--------------|
| 1      | 23.25 | 49.25 | 38.50       | 36.00        |
| 2      | 39.00 | 48.00 | 29.80       | 43.01        |
| 3      | 41.25 | 50.00 | 38.60       | 37.02        |
| 4      | 37.75 | 50.00 | 37.50       | 41.00        |
| 5      | 28.25 | 60.00 | 35.80       | 36.03        |
| 6      | 48.75 | 46.30 | 45.25       | 38.50        |
| 7      | 28.25 | 60.00 | 40.50       | 30.00        |
| 8      | 25.68 | 41.50 | 48.20       | 50.00        |

#### DAY 3

| Number | CON | CPZ | 20 mg/kg PB | 100 mg/kg PB |
|--------|-----|-----|-------------|--------------|
|--------|-----|-----|-------------|--------------|

|   |       |       |       |       |
|---|-------|-------|-------|-------|
| 1 | 21.00 | 22.50 | 34.00 | 46.01 |
| 2 | 33.00 | 58.01 | 39.01 | 35.00 |
| 3 | 30.50 | 35.01 | 47.50 | 33.25 |
| 4 | 22.00 | 50.02 | 41.70 | 40.75 |
| 5 | 44.51 | 40.00 | 36.00 | 33.25 |
| 6 | 31.01 | 49.00 | 41.02 | 20.75 |
| 7 | 44.50 | 39.01 | 27.00 | 32.75 |
| 8 | 33.00 | 41.00 | 44.50 | 34.25 |

#### DAY 4

| Number | CON   | CPZ   | 20 mg/kg PB | 100 mg/kg PB |
|--------|-------|-------|-------------|--------------|
| 1      | 9.00  | 38.00 | 33.00       | 21.75        |
| 2      | 17.33 | 34.33 | 30.50       | 21.25        |
| 3      | 11.67 | 45.33 | 46.25       | 20           |
| 4      | 10.33 | 34.58 | 36.25       | 31.67        |
| 5      | 28.33 | 42.00 | 31.75       | 30.00        |
| 6      | 24.00 | 38.00 | 34.50       | 19.00        |
| 7      | 43.67 | 33.55 | 28.02       | 30.67        |
| 8      | 18.01 | 34.33 | 36.41       | 25.00        |

#### DAY 5

| Number | CON   | CPZ   | 20 mg/kg PB | 100 mg/kg PB |
|--------|-------|-------|-------------|--------------|
| 1      | 19.00 | 31.00 | 38.00       | 17.00        |
| 2      | 8.00  | 25.40 | 23.01       | 24.02        |
| 3      | 10.01 | 35.40 | 27.00       | 20.01        |
| 4      | 3.00  | 43.01 | 26.10       | 14.00        |
| 5      | 11.00 | 23.69 | 23.02       | 7.00         |
| 6      | 36.01 | 25.4  | 46.00       | 24.00        |
| 7      | 12.00 | 28.5  | 44.00       | 6.02         |
| 8      | 13.00 | 20.00 | 23.00       | 18.03        |

#### 3-2 Distance in the target quadrant in probe test

| Number | CON     | CPZ     | 20 mg/kg PB | 100 mg/kg PB |
|--------|---------|---------|-------------|--------------|
| 1      | 54.10   | 347.07  | 264.34      | 425.29       |
| 2      | 602.94  | 393.07  | 235.06      | 474.01       |
| 3      | 454.81  | 347.97  | 442.25      | 274.35       |
| 4      | 507.91  | 247.15  | 413.73      | 380.82       |
| 5      | 436.49  | 259.77  | 451.65      | 347.78       |
| 6      | 492.36  | 403.24  | 248.25      | 458.39       |
| 7      | 421.658 | 366.10  | 395.33      | 382.16       |
| 8      | 407.97  | 477.411 | 428.33      | 433.06       |

#### 3-3 Time spent in the target quadrant in probe test

| Number | CON   | CPZ   | 20 mg/kg PB | 100 mg/kg PB |
|--------|-------|-------|-------------|--------------|
| 1      | 25.52 | 15.42 | 15.25       | 20.58        |

|   |       |       |       |       |
|---|-------|-------|-------|-------|
| 2 | 27.50 | 15.17 | 16.99 | 20.05 |
| 3 | 40.55 | 18.94 | 17.21 | 25.19 |
| 4 | 20.31 | 18.80 | 25.62 | 23.07 |
| 5 | 33.53 | 17.08 | 19.14 | 25.27 |
| 6 | 25.65 | 21.24 | 19.18 | 27.24 |
| 7 | 23.15 | 21.22 | 12.36 | 18.22 |
| 8 | 24.12 | 19.20 | 10.36 | 19.66 |

### 3-4 Crossings into the former location of the platform

| Number | CON | CPZ | 20 mg/kg PB | 100 mg/kg PB |
|--------|-----|-----|-------------|--------------|
| 1      | 2   | 0   | 1           | 2            |
| 2      | 5   | 1   | 0           | 2            |
| 3      | 3   | 2   | 4           |              |
| 4      | 2   | 0   | 1           | 1            |
| 5      | 2   | 1   | 4           | 1            |
| 6      | 1   | 2   | 3           | 3            |
| 7      | 4   | 0   | 2           | 2            |
| 8      | 0   | 2   | 0           | 3            |

### 3-5 Swimming speed in probe test

| Number | CON   | CPZ    | 20 mg/kg PB | 100 mg/kg PB |
|--------|-------|--------|-------------|--------------|
| 1      | 23.04 | 25.92  | 24.54       | 26.08        |
| 2      | 25.33 | 22.49  | 24.49       | 24.84        |
| 3      | 24.53 | 25.548 | 19.20       | 25.34        |
| 4      | 27.56 | 18.06  | 29.44       | 29.18        |
| 5      | 29.68 | 25.76  | 25.28       | 24.88        |
| 6      | 23.85 | 24.47  | 22.27       | 30.49        |
| 7      | 26.33 | 27.58  | 23.57       | 25.57        |
| 8      | 26.85 | 25.83  | 27.69       | 21.60        |
